# Supplementary material for: Development of a Thymoquinone Polymeric Anticancer Nanomedicine through Optimization of Polymer Molecular Weight and Nanoparticle Architecture
Source: MDPI journal article supplement (doi:10.3390/pharmaceutics12090811), 2020-08-27
Supplement: s1 [file s1]

# Supplementary Materials: Development of a Thymoquinone Polymeric Anticancer Nanomedicine through Optimization of Polymer Molecular Weight and Nanoparticle Architecture

Suhair Sunoqrot, Malek Farraj, Ala'a M. Hammad, Violet Kasabri, Dana Shalabi, Ahmad A. Deeb, Lina Hasan Ibrahim, Khaldoun Shnewer and Ismail Yousef

**Table S1.** Characterization of the copolymers synthesized in this study.

| Copolymer       | mPEG: CL | MW of PCL by <sup>1</sup> H-NMR (g/mol) |
|-----------------|----------|-----------------------------------------|
| mPEG5K-PCL10.3K | 1:2      | 10,364                                  |
| mPEG5K-PCL18.5K | 1:4      | 18,506                                  |

**Table S2.** Characterization of TQ NPs prepared in this study (values correspond to Figure 2 of the main text).

| Formulation | Particle Size (nm) | PDI         | Zeta Potential (mV) | Loading (µg TQ/Mg Polymer) | Loading Efficiency (%) |
|-------------|--------------------|-------------|---------------------|----------------------------|------------------------|
| F1-NS       | 72 ± 4             | 0.26 ± 0.05 | -9.2 ± 3.7          | 24.0 ± 9.0                 | 24.0 ± 9.0             |
| F1-NC       | 130 ± 16           | 0.17 ± 0.03 | -14.2 ± 2.6         | 60.1 ± 0.9                 | 60.1 ± 0.9             |
| F2-NS       | 72 ± 3             | 0.26 ± 0.04 | -9.5 ± 3.9          | 26.3 ± 1.2                 | 26.3 ± 1.2             |
| F2-NC       | 117 ± 4            | 0.16 ± 0.01 | -10.6 ± 2.6         | 58.7 ± 7.2                 | 58.7 ± 7.2             |

**Table S3.** Kinetic parameters for TQ release from F1-NC and F2-NC obtained by fitting in vitro release data to different kinetic models of drug release (Equations (3)–(5)). The best-fit models for each formulation are highlighted in yellow.

| Formulation | Release Medium | Korsmeyer–Peppas |                        |          | Zero-Order     |                       | First-Order    |                       |
|-------------|----------------|------------------|------------------------|----------|----------------|-----------------------|----------------|-----------------------|
|             |                | R <sup>2</sup>   | <i>k</i> <sub>KP</sub> | <i>n</i> | R <sup>2</sup> | <i>k</i> <sub>0</sub> | R <sup>2</sup> | <i>k</i> <sub>1</sub> |
| F1-NC       | pH 7.4         | 0.99655          | 31.076                 | 0.6135   | 0.98443        | 14.641                | 0.95703        | 0.334                 |
|             | pH 5.0         | 0.97243          | 4.8104                 | 2.1978   | 0.99528        | 20.993                | 0.90291        | 1.1766                |
| F2-NC       | pH 7.4         | 0.99288          | 14.604                 | 0.7223   | 0.98679        | 7.7204                | 0.92006        | 0.2478                |
|             | pH 5.0         | 0.98520          | 5.7026                 | 2.1383   | 1.0000         | 24.218                | 0.92782        | 1.1528                |

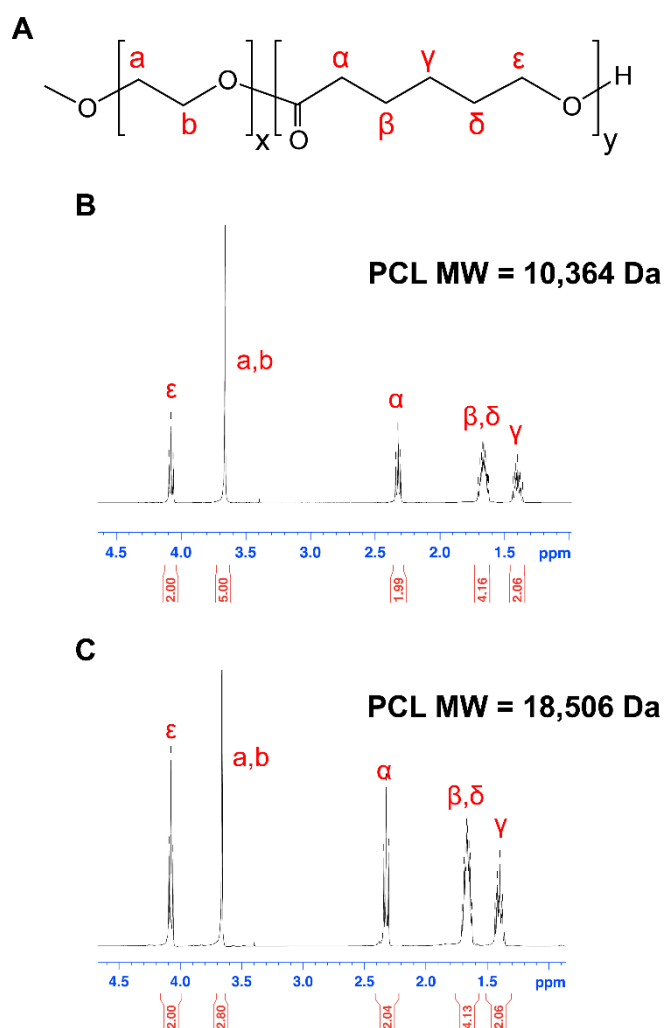

**Figure S1.** Confirmation of mPEG-PCL structure and MW by  $^1\text{H-NMR}$ . (A) Chemical structure of mPEG-PCL; (B)  $^1\text{H-NMR}$  spectrum of mPEG5K-PCL10.3K synthesized at an mPEG:CL feed ratio of 1:2; (C)  $^1\text{H-NMR}$  spectrum of mPEG5K-PCL18.5K synthesized at an mPEG:CL feed ratio of 1:4. The MW of the PCL blocks was calculated based on the relative integration ratio of the ethylene oxide protons (a,b) to any one of the PCL protons ( $\alpha$ ,  $\beta$ ,  $\gamma$ ,  $\delta$ , or  $\epsilon$ ).
